# Supplementary material for: Occurrence and Characterization of Salmonella Isolated from Large-Scale Breeder Farms in Shandong Province, China
Source: Biomed Res Int. 2019 Apr 16;2019:8159567. doi: 10.1155/2019/8159567 (PMC6500603; doi:10.1155/2019/8159567)
Supplement: Supplementary Materials — Table 7 is the supplementary material, which includes the data of inhibition zone of 63 Salmonella in drug susceptibility test. [file 8159567.f1.xlsx]

## Sheet: Sheet1
	CIP		NAL		EM		STR		MOR		CTX		GEN		AMP		SXT		CRO		PB		TET		CHL
1	26	I	0	R	0	R	0	R	24	S	30	S	22	S	0	R	22	S	30	S	19	S	20	S	26	S
2	25	I	0	R	11	R	0	R	22	S	26	S	25	S	0	R	19	S	26	S	20	S	0	R	28	S
3	25	I	0	R	14	I	0	R	23	S	28	S	22	S	0	R	25	S	29	S	16	S	17	I	25	S
4	26	I	0	R	14	I	0	R	22	S	30	S	27	S	0	R	22	S	26	S	17	S	0	R	27	S
5	25	I	0	R	10	R	0	R	25	S	30	S	20	S	0	R	25	S	27	S	16	S	17	I	25	S
6	25	I	0	R	0	R	0	R	23	S	30	S	21	S	0	R	18	S	27	S	14	S	0	R	25	S
7	24	I	0	R	7	R	0	R	20	S	30	S	20	S	0	R	18	S	26	S	14	S	15	I	22	S
8	29	I	0	R	7	R	0	R	25	S	27	S	24	S	0	R	25	S	29	S	15	S	17	I	26	S
9	25	I	0	R	0	R	0	R	23	S	30	S	20	S	0	R	20	S	25	S	13	S	15	I	25	S
10	25	I	10	R	10	R	0	R	25	S	30	S	20	S	0	R	22	S	28	S	16	S	16	I	24	S
11	26	I	0	R	12	R	0	R	25	S	30	S	29	S	0	R	23	S	32	S	15	S	0	R	25	S
12	25	I	0	R	11	R	0	R	22	S	30	S	20	S	0	R	20	S	27	S	16	S	16	I	23	S
13	26	I	0	R	0	R	0	R	24	S	30	S	16	S	0	R	23	S	26	S	15	S	17	I	23	S
14	26	I	0	R	12	R	0	R	23	S	30	S	22	S	0	R	20	S	27	S	16	S	0	R	24	S
15	26	I	0	R	12	R	0	R	22	S	31	S	20	S	0	R	25	S	28	S	15	S	19	S	28	S
16	25	I	0	R	10	R	0	R	16	I	29	S	20	S	0	R	23	S	25	S	15	S	0	R	24	S
17	24	I	0	R	0	R	0	R	22	S	26	S	19	S	0	R	20	S	15	R	14	S	17	I	24	S
18	25	I	0	R	9	R	0	R	22	S	29	S	20	S	0	R	21	S	24	S	14	S	0	R	24	S
19	26	I	0	R	13	R	0	R	23	S	29	S	22	S	0	R	20	S	27	S	17	S	18	I	25	S
20	25	I	0	R	0	R	0	R	22	S	30	S	21	S	0	R	18	S	26	S	13	S	16	I	22	S
21	27	I	7	R	7	R	0	R	23	S	27	S	20	S	0	R	21	S	30	S	15	S	15	I	27	S
22	25	I	0	R	7	R	0	R	22	S	27	S	20	S	0	R	21	S	26	S	13	S	0	R	24	S
23	25	I	0	R	0	R	0	R	22	S	28	S	20	S	0	R	23	S	30	S	15	S	19	S	26	S
24	25	I	0	R	11	R	0	R	22	S	29	S	20	S	0	R	20	S	28	S	17	S	20	S	29	S
25	25	I	0	R	8	R	0	R	23	S	32	S	28	S	0	R	25	S	30	S	16	S	20	S	22	S
26	27	I	0	R	11	R	0	R	22	S	30	S	20	S	0	R	24	S	30	S	16	S	17	I	24	S
27	25	I	0	R	15	R	0	R	24	S	30	S	25	S	0	R	26	S	30	S	16	S	0	R	26	S
28	22	I	0	R	10	R	0	R	25	S	30	S	22	S	0	R	28	S	31	S	16	S	0	R	27	S
29	25	I	0	R	0	R	0	R	20	S	28	S	20	S	0	R	23	S	24	S	14	S	15	I	25	S
30	25	I	0	R	10	R	0	R	22	S	30	S	22	S	0	R	25	S	25	S	14	S	17	I	25	S
31	25	I	0	R	0	R	0	R	22	S	29	S	19	S	0	R	24	S	27	S	15	S	17	I	25	S
32	25	I	0	R	10	R	0	R	22	S	27	S	21	S	0	R	23	S	26	S	14	S	15	I	22	S
33	25	I	0	R	0	R	0	R	22	S	27	S	20	S	0	R	24	S	25	S	15	S	17	I	25	S
34	25	I	0	R	0	R	0	R	24	S	27	S	20	S	0	R	25	S	29	S	15	S	0	R	28	S
35	30	I	0	R	12	R	0	R	25	S	31	S	20	S	0	R	24	S	27	S	16	S	0	R	24	S
36	29	I	0	R	15	I	0	R	23	S	30	S	20	S	0	R	24	S	28	S	15	S	19	S	25	S
37	25	I	0	R	10	R	0	R	24	S	30	S	16	S	0	R	24	S	30	S	15	S	16	I	25	S
38	25	I	0	R	12	R	0	R	22	S	30	S	20	S	0	R	21	S	30	S	15	S	0	R	25	S
39	30	I	0	R	12	R	0	R	21	S	22	S	25	S	0	R	24	S	27	S	15	S	0	R	25	S
40	25	I	0	R	0	R	0	R	21	S	28	S	22	S	0	R	20	S	30	S	15	S	16	I	25	S
41	25	I	0	R	12	R	0	R	23	S	27	S	20	S	0	R	20	S	28	S	17	S	17	I	23	S
42	25	I	0	R	0	R	0	R	22	S	30	S	20	S	0	R	20	S	27	S	15	S	16	I	22	S
43	25	I	0	R	0	R	0	R	22	S	27	S	20	S	0	R	20	S	25	S	16	S	17	I	26	S
44	25	I	0	R	10	R	0	R	22	S	27	S	21	S	0	R	20	S	27	S	14	S	13	R	25	S
45	30	I	0	R	10	R	0	R	28	S	30	S	22	S	0	R	25	S	30	S	17	S	17	I	28	S
46	25	I	0	R	7	R	0	R	22	S	29	S	20	S	0	R	20	S	29	S	13	S	17	I	23	S
47	25	I	0	R	0	R	0	R	22	S	30	S	24	S	0	R	25	S	30	S	15	S	16	I	25	S
48	25	I	0	R	0	R	0	R	21	S	28	S	22	S	0	R	21	S	25	S	15	S	0	R	25	S
49	29	I	0	R	10	R	0	R	24	S	28	S	25	S	0	R	21	S	29	S	18	S	12	R	25	S
50	27	I	0	R	8	R	0	R	25	S	30	S	22	S	0	R	24	S	27	S	17	S	18	I	25	S
51	25	I	0	R	12	R	0	R	25	S	30	S	20	S	0	R	24	S	30	S	16	S	17	I	27	S
52	23	I	0	R	12	R	0	R	21	S	30	S	20	S	0	R	20	S	27	S	15	S	0	R	24	S
53	25	I	0	R	0	R	0	R	21	S	27	S	20	S	0	R	20	S	22	I	15	S	0	R	22	S
54	25	I	0	R	10	R	0	R	23	S	28	S	17	S	0	R	20	S	21	I	16	S	0	R	25	S
55	25	I	0	R	13	R	0	R	24	S	30	S	23	S	0	R	20	S	30	S	16	S	0	R	27	S
56	27	I	0	R	0	R	0	R	24	S	30	S	20	S	0	R	20	S	26	S	15	S	17	I	23	S
57	23	I	0	R	9	R	0	R	20	S	29	S	20	S	0	R	22	S	26	S	15	S	15	I	27	S
58	25	I	0	R	12	R	0	R	22	S	27	S	20	S	0	R	21	S	26	S	14	S	0	R	22	S
59	25	I	0	R	10	R	0	R	25	S	30	S	25	S	0	R	22	S	27	S	15	S	0	R	25	S
60	24	I	0	R	0	R	0	R	21	S	26	S	19	S	0	R	21	S	28	S	13	S	16	I	23	S
61	28	I	0	R	10	R	0	R	24	S	30	S	24	S	0	R	25	S	28	S	16	S	18	I	27	S
62	21	I	0	R	0	R	0	R	22	S	30	S	18	S	19	S	20	S	26	S	15	S	16	I	25	S
63	25	I	0	R	13	R	0	R	22	S	30	S	19	S	0	R	17	S	25	S	12	S	15	I	20	S
